# Supplementary material for: Structural characterisation of the photoisomers of reactive sulfonated azo dyes by NMR spectroscopy and DFT calculations
Source: Royal Society of Chemistry journal article supplement (doi:10.1039/b703044d), 2007-04-20
Supplement: b703044d.pdf [file b703044d.pdf]

## Structural characterisation of the photoisomers of reactive sulfonated azo dyes by NMR spectroscopy and *ab initio* calculations

Katrina M. Tait<sup>a</sup>, John A. Parkinson<sup>b</sup>, David I. Gibson<sup>a</sup>, Patricia R. Richardson<sup>a</sup> Warren J. Ebenezer<sup>c</sup>, Michael G. Hutchings<sup>c</sup> and Anita C. Jones<sup>\*a</sup>

### Supporting Information

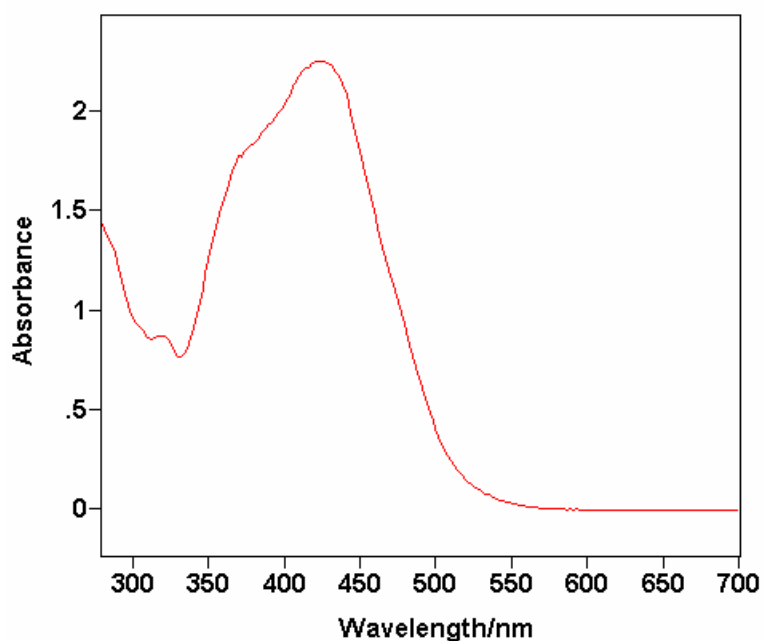

**Figure S1** UV-Vis absorption spectrum of **1** in DMSO. Sample concentration =  $1 \times 10^{-4}$  M.

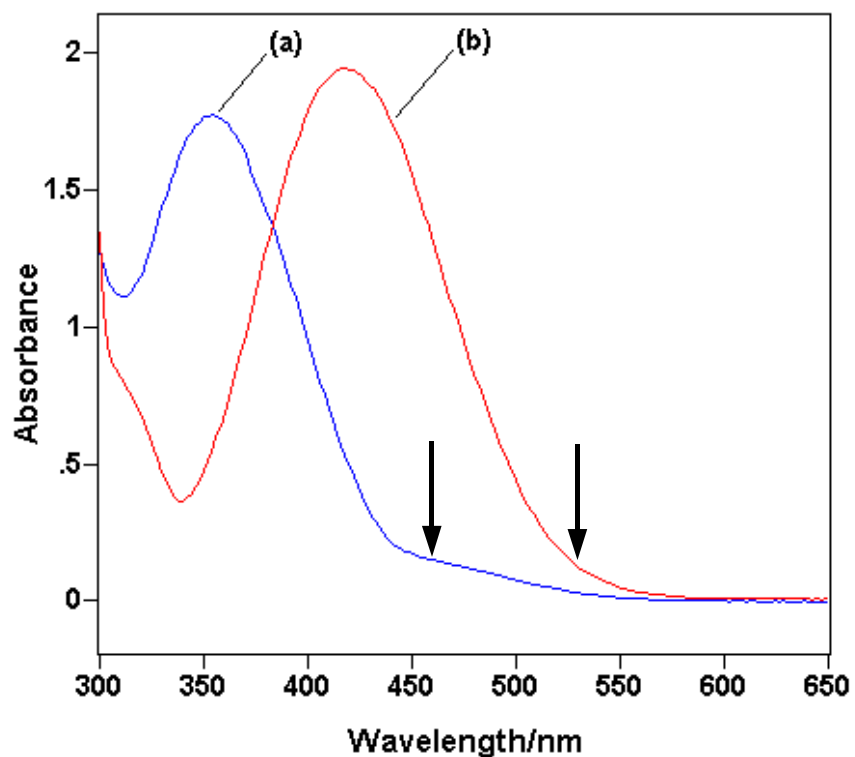

**Figure S2** UV-Visible spectra of (a) **2** and (b) **2a** (the dyebase of **2**) in DMSO. Sample concentration =  $1 \times 10^{-4}$  M. Irradiation wavelengths of 457 and 530 nm, respectively, are shown by arrows.

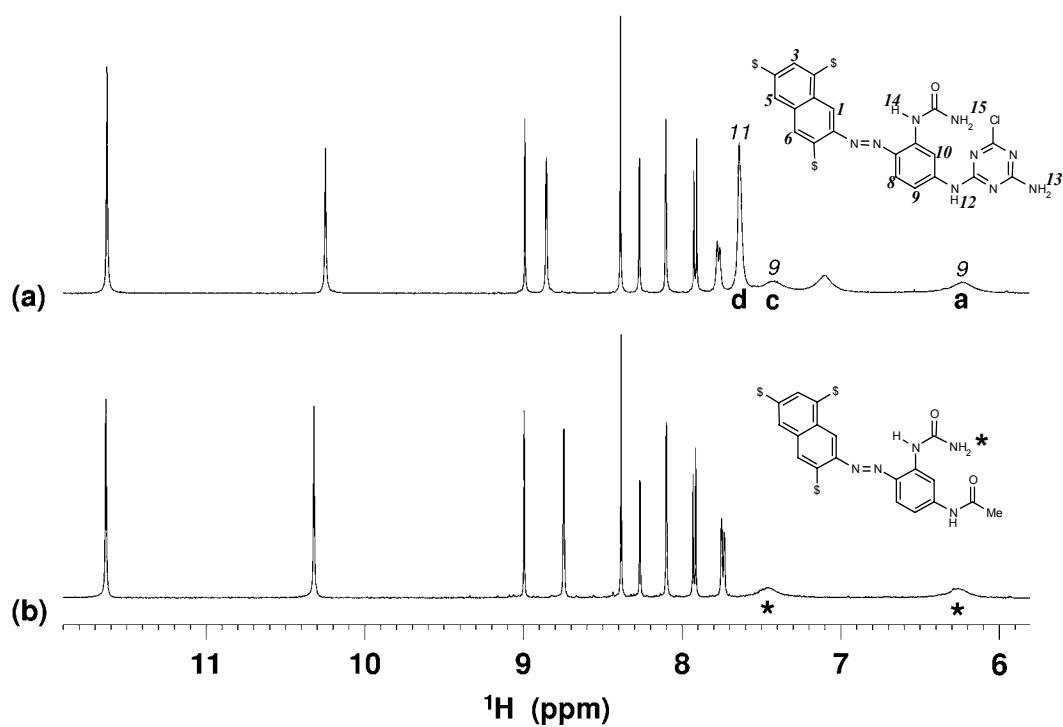

**Figure S3** 500 MHz 1D <sup>1</sup>H NMR spectra of (a) **1** (1.77 mM in *d*<sub>6</sub>-DMSO) and (b) the closely related molecule designated **6** (1.28 mM in *d*<sub>6</sub>-DMSO) recorded in darkness. In (b) asterisks indicate the broadened resonances associated with unique magnetic environments of the two individual NH protons associated with the only NH<sub>2</sub> group of **6**.

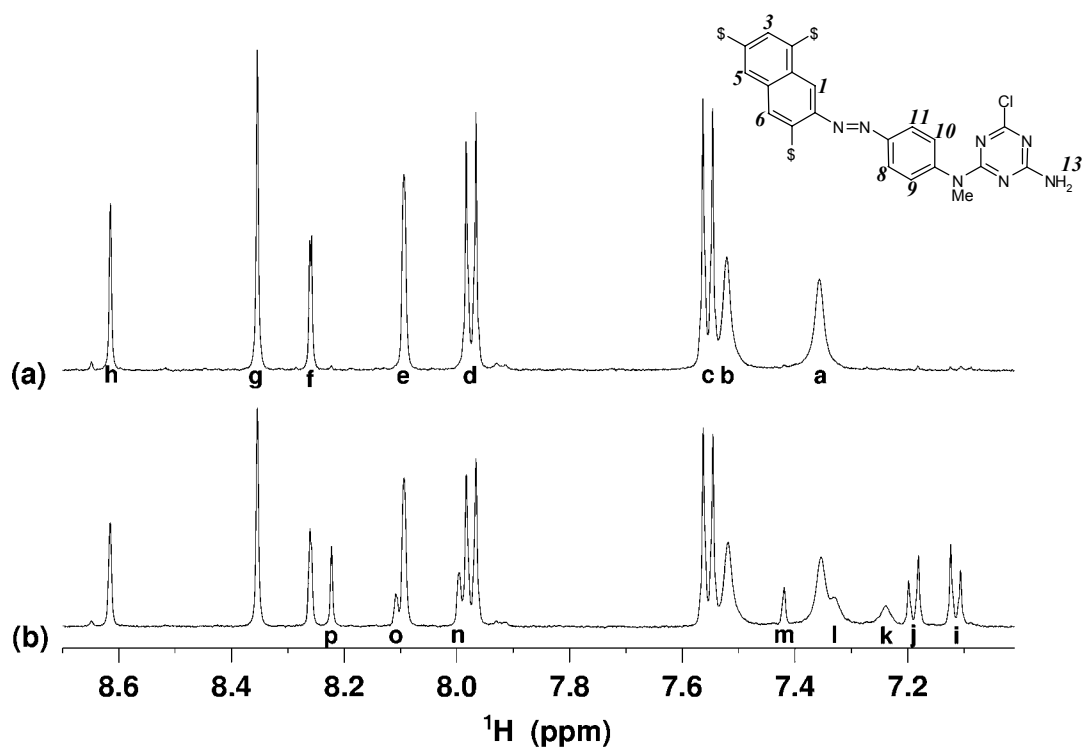

**Figure S4:** 500 MHz 1D <sup>1</sup>H NMR spectra of **2** (0.75 mM in *d*<sub>6</sub>-DMSO) (a) prior to irradiation and (b) after irradiation to the 457 nm PSS. Atom labeling is indicated in the molecular diagram.

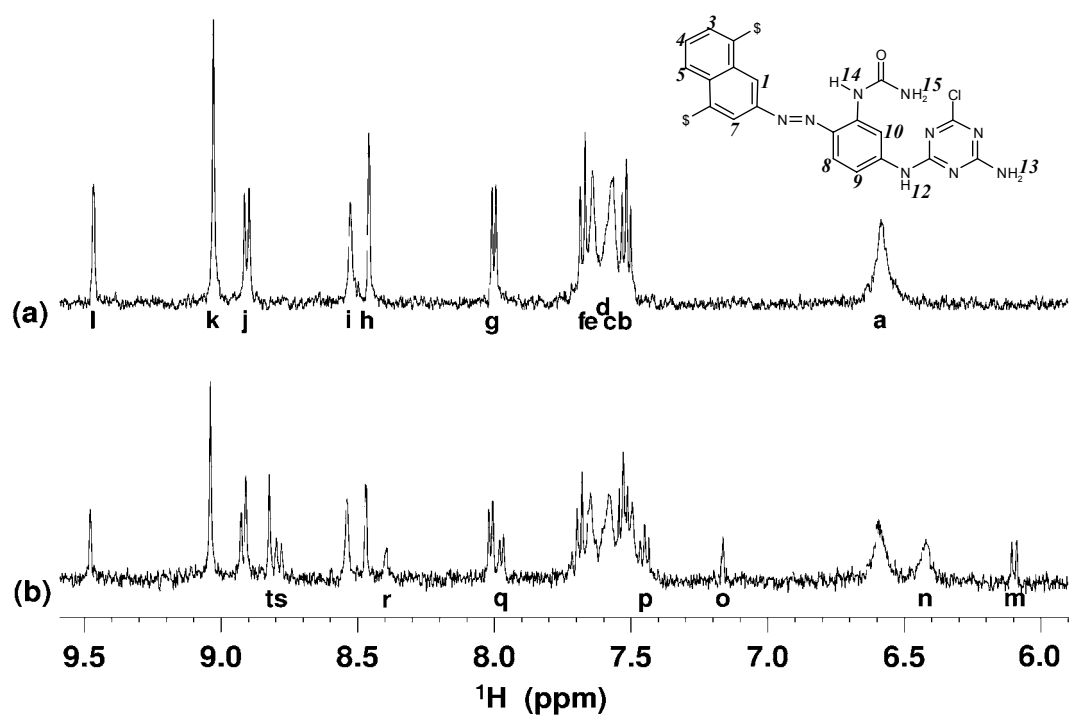

**Figure S5** 500 MHz 1D  $^1\text{H}$  NMR spectra of **3** (0.38 mM in  $d_6$ -DMSO) (a) prior to irradiation and (b) after irradiation to the 514 nm PSS.

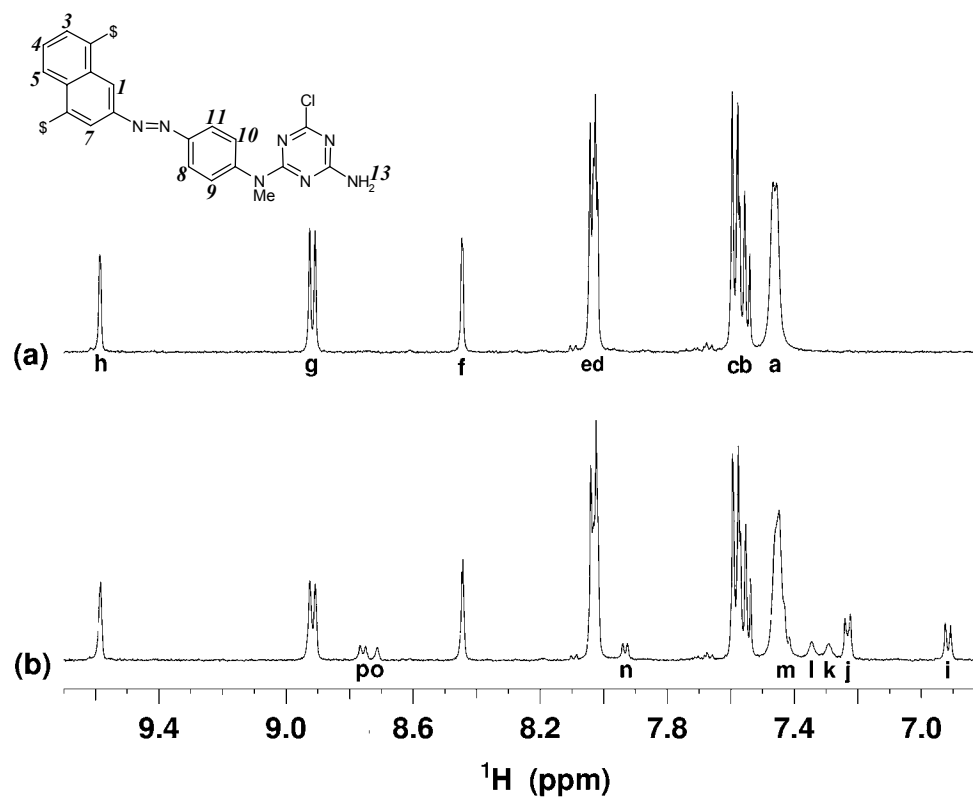

**Figure S6** 500 MHz 1D <sup>1</sup>H NMR spectra of 4 (1.23 mM in *d*<sub>6</sub>-DMSO) (a) prior to irradiation and (b) after irradiation to the 488 nm PSS.

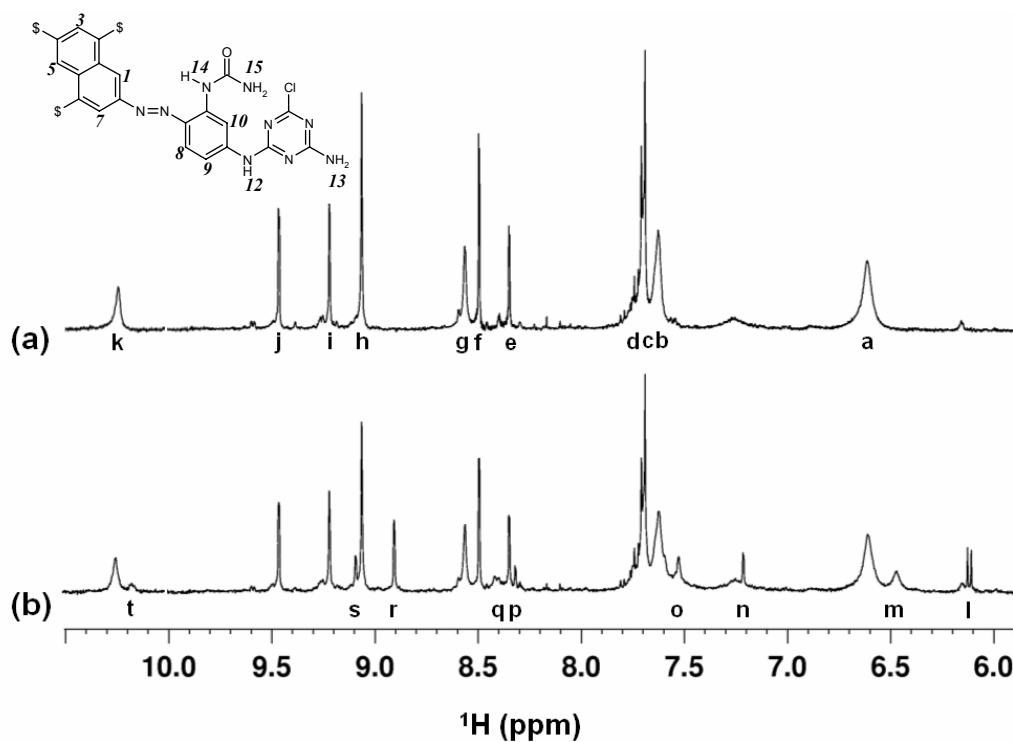

**Figure S7** 500 MHz 1D  $^1\text{H}$  NMR spectrum of **5** (0.35 mM in  $d_6$ -DMSO) (a) prior to irradiation and (b) after irradiation to the 530 nm PSS.

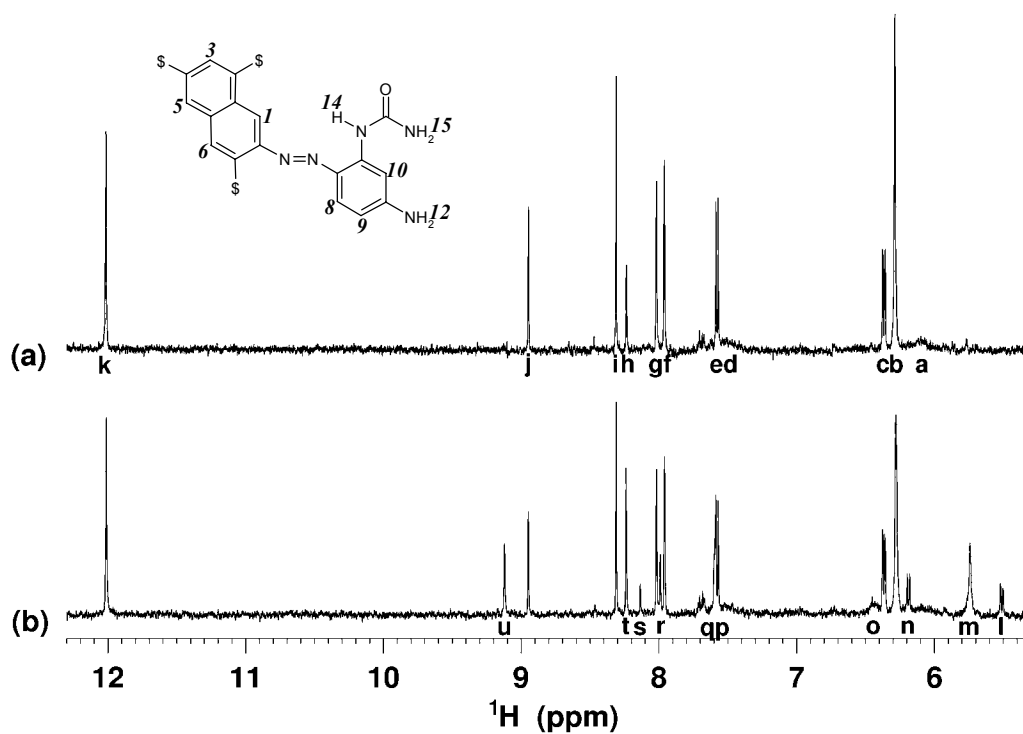

**Figure S8** 500 MHz 1D  $^1\text{H}$  NMR spectrum of **1a** (0.45 mM in  $d_6$ -DMSO) (a) prior to irradiation and (b) after irradiation to the 530 nm PSS.



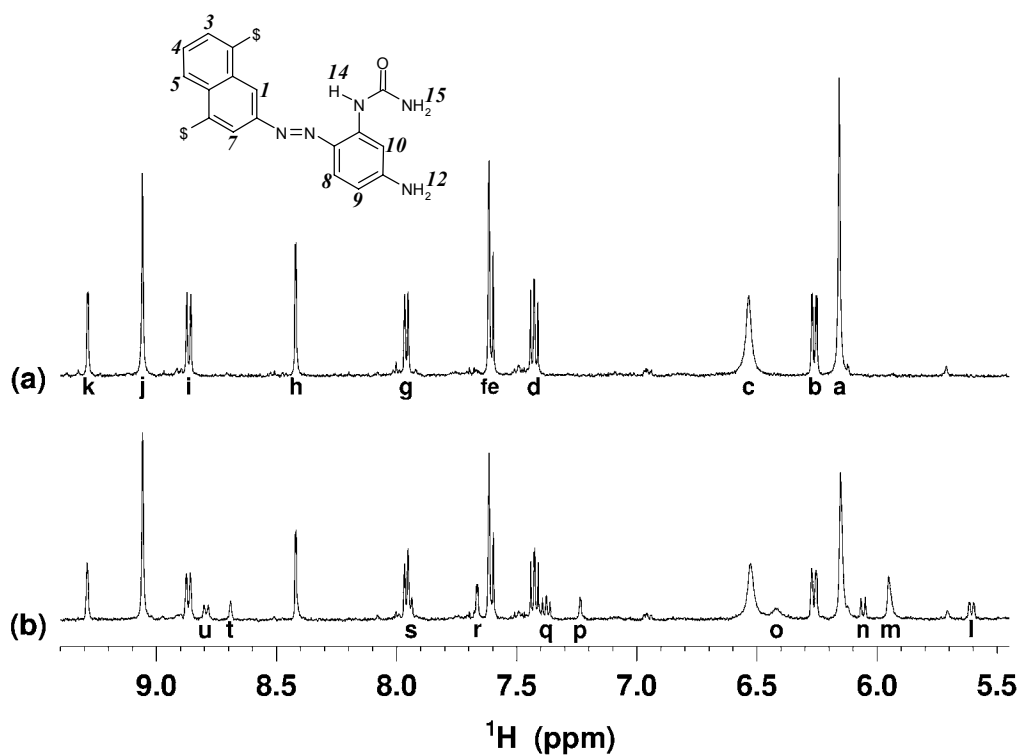

**Figure S9** 500 MHz 1D <sup>1</sup>H NMR spectra of **3a** (1.28 mM in d<sub>6</sub>-DMSO) (a) prior to irradiation and (b) after irradiation to the 530 nm PSS.

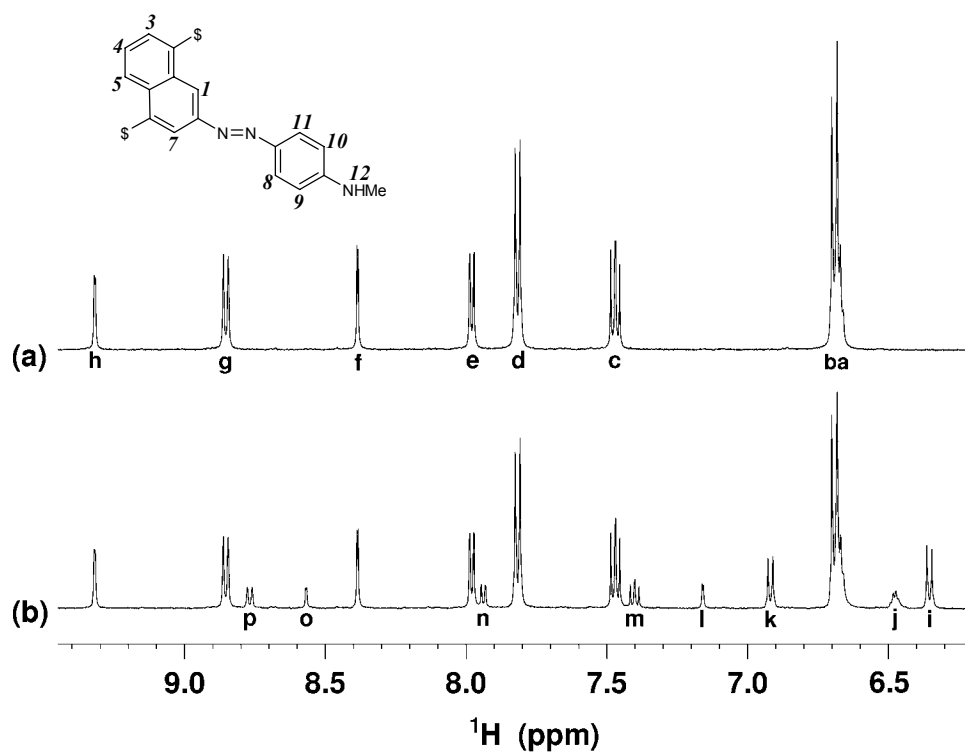

**Figure S10** 500 MHz 1D <sup>1</sup>H NMR spectra of 4a (0.80 mM in d<sub>6</sub>-DMSO) (a) prior to irradiation and (b) after irradiation to the 514 nm PSS.

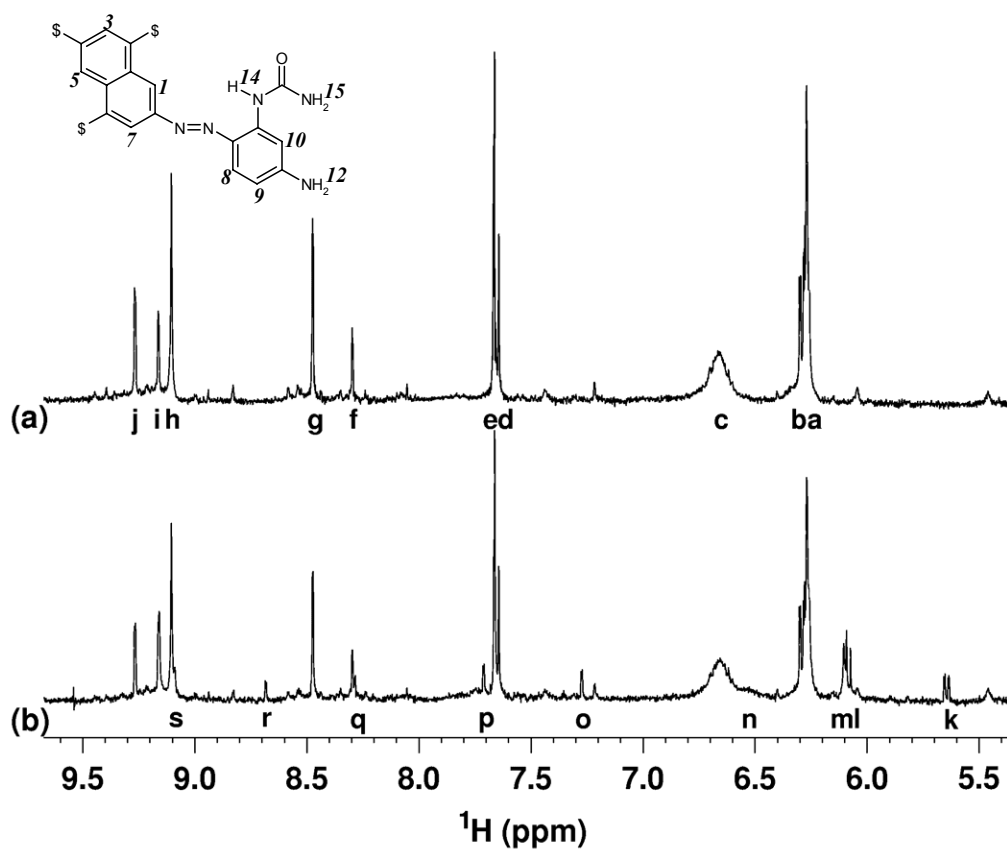

**Figure S11** 500 MHz 1D  $^1\text{H}$  NMR spectra of **5a** (0.19 mM in  $d_6$ -DMSO) (a) prior to irradiation and (b) after irradiation to the 530 nm PSS.
